# Supplementary material for: Small molecule RITA binds to p53, blocks p53–HDM-2 interaction and activates p53 function in tumors
Source: Springer Nature journal article supplement (doi:10.1038/nm1146), 2004-11-21
Supplement: nm1146-S3.pdf [file nm1146-S3.pdf]

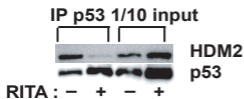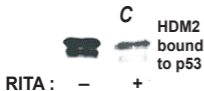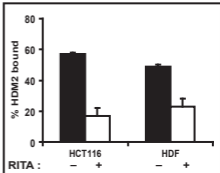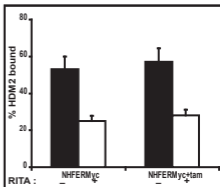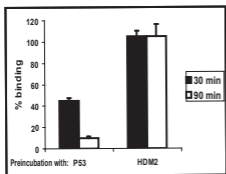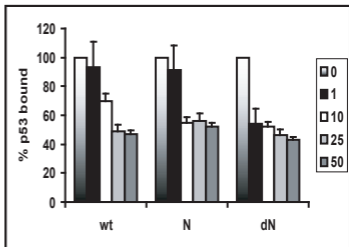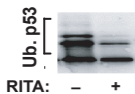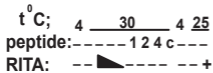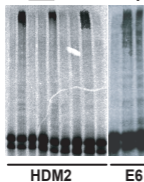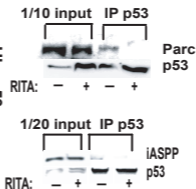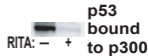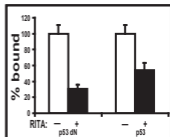

Figure 3. RITA did not inhibit the binding of p53 to the monoclonal antibody DO1 and Bcl-xL. *a*, the binding of the purified p53 protein non-treated or treated with RITA (1 to 50  $\mu$ M) to DO1 was assessed by two-site ELISA. *b*, treatment of HCT116 cells with RITA did not affect the binding of p53 to Bcl-xL as assessed by two-site ELISA.
